# Supplementary material
Source: PubMed Central journal article supplement (PMC4257902)

Diversity in the pre-immune immunoglobulin repertoire of SHR lines susceptible and resistant to end organ injury.

Manuel L. Gonzalez-Garay, Stacy M. Cranford, Michael C. Braun and Peter A. Doris

**Supplementary Figure 2**

Distribution of sequence read coverage density across the rat IGH locus on chromosome 6. Read coverage was binned over 100kbase bins and plotted for both SHR lines. Genome-wide average coverage for SHR-A3 was 43.6 and for SHR-B2 was 48.5.

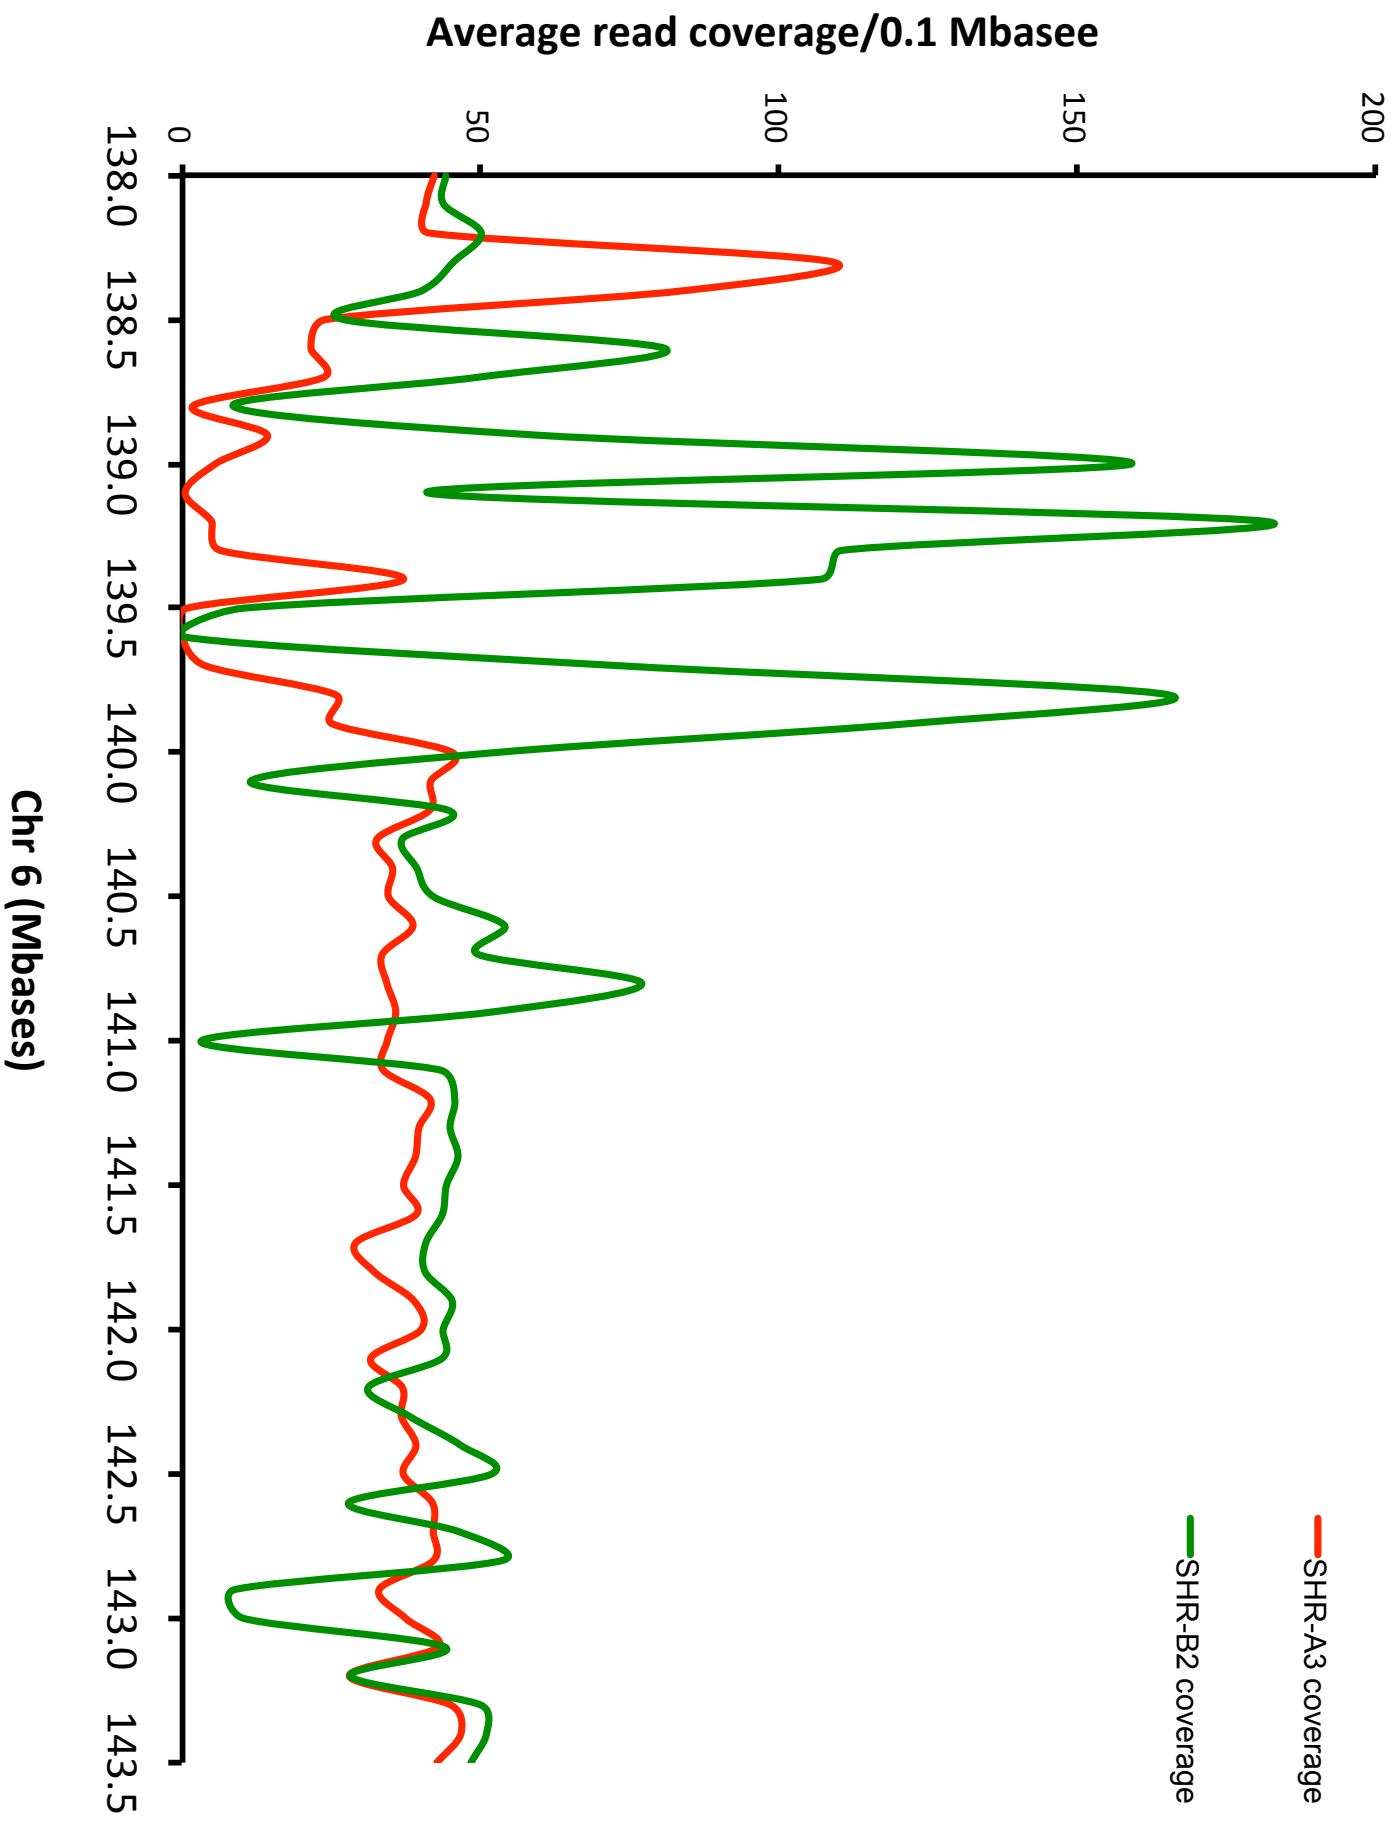

Supplement: NIHMS598991-supplement-2.pdf [file NIHMS598991-supplement-2.pdf]
