# Supplementary material
Source: PubMed Central journal article supplement (PMC4257902)

Diversity in the pre-immune immunoglobulin repertoire of SHR lines susceptible and resistant to end organ injury.

Manuel L. Gonzalez-Garay, Stacy M. Cranford, Michael C. Braun and Peter A. Doris

**Supplementary Figure 3**

Distribution of sequence variation across the rat IGH locus on chromosome 6. Variation was binned over 100kbase bins and plotted for both SHR lines.

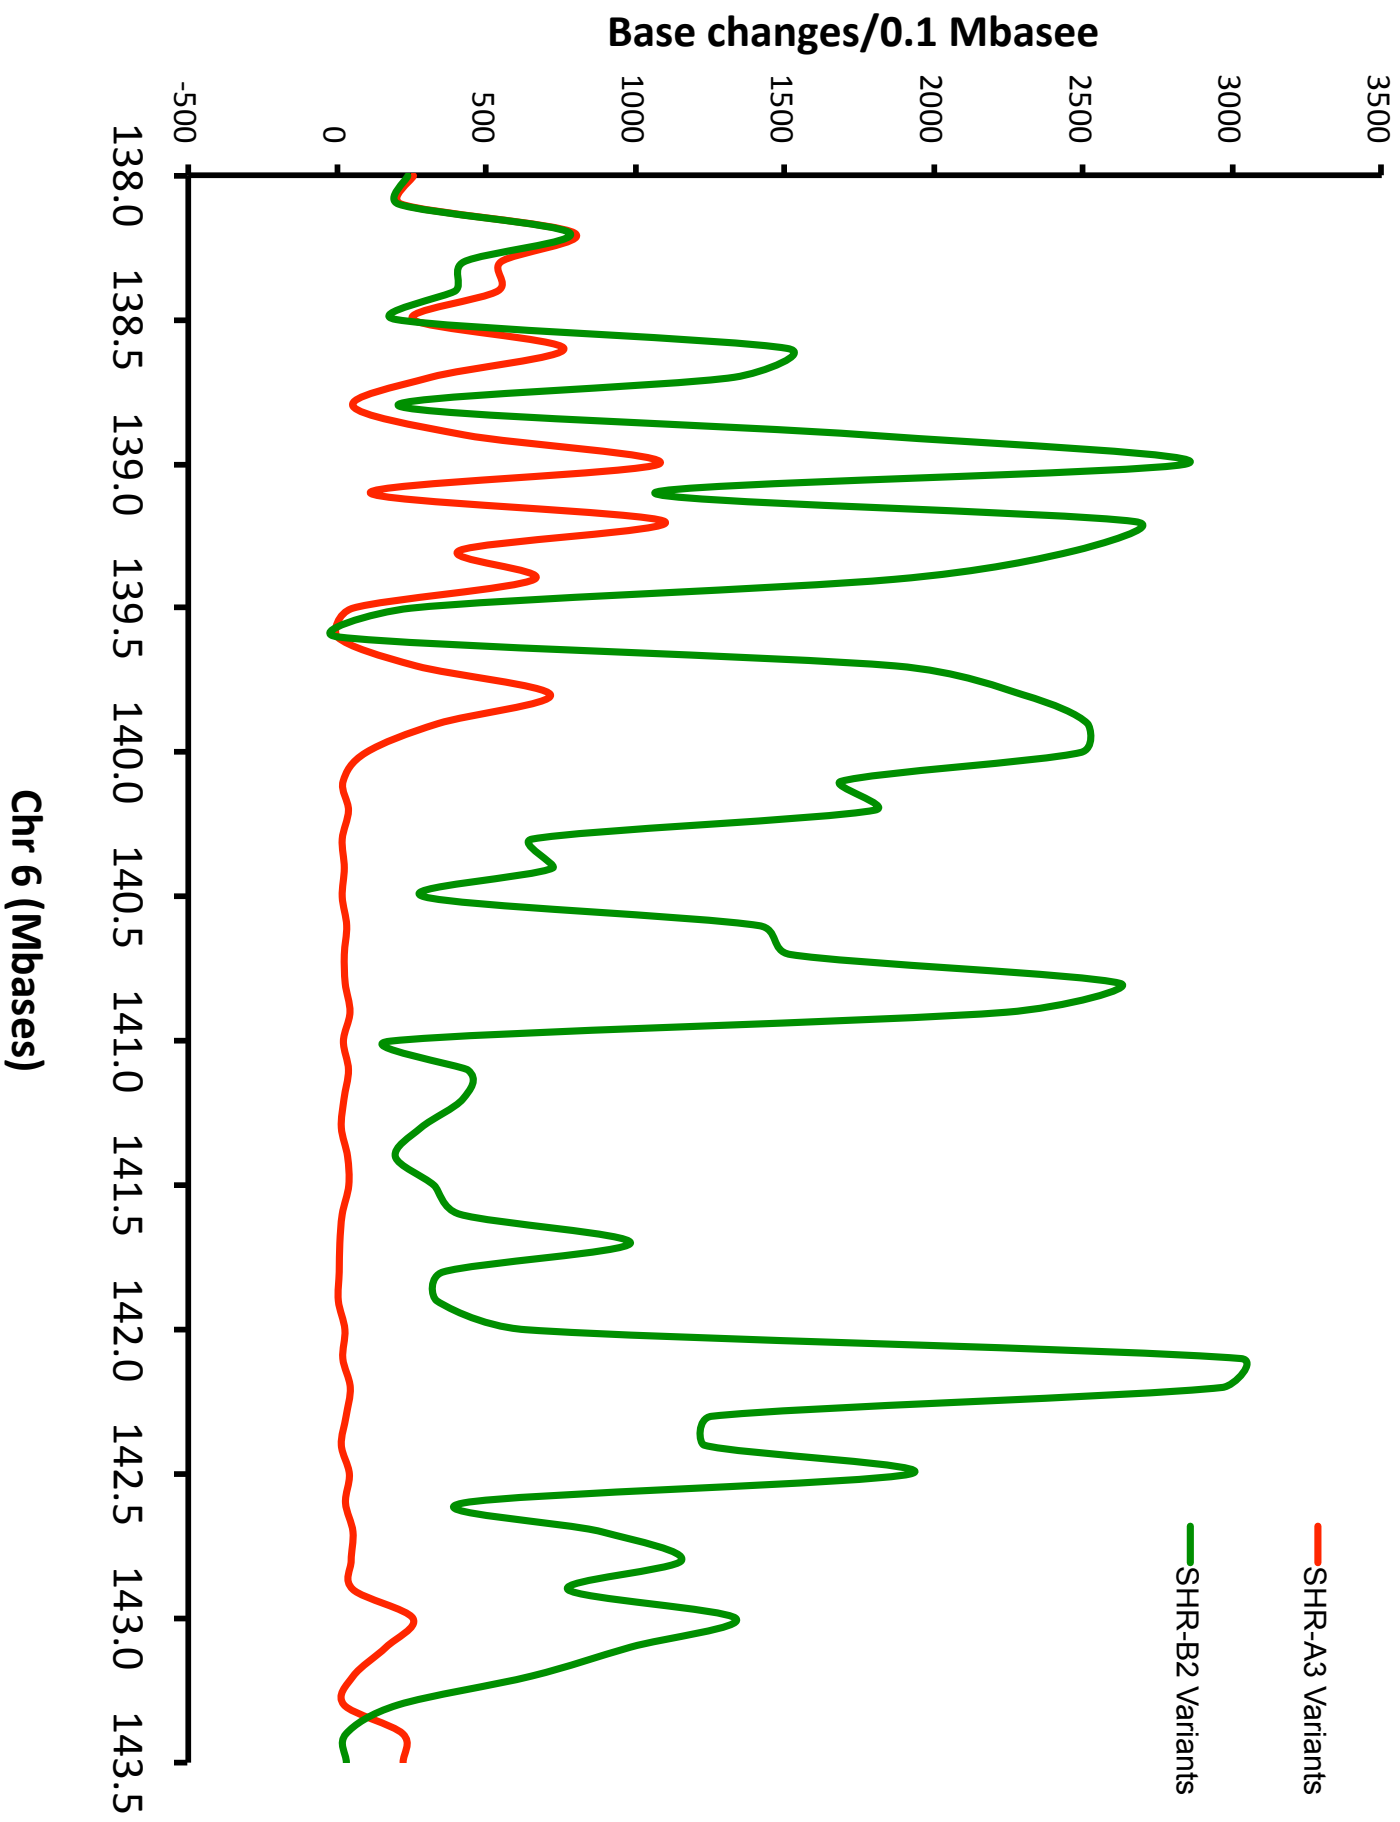

Supplement: NIHMS598991-supplement-3.pdf [file NIHMS598991-supplement-3.pdf]
